# Supplementary material for: Streptococcus mutans adhesion force sensing in multi-species oral biofilms
Source: PubMed Central journal article supplement (PMC7314845; doi:10.1038/s41522-020-0135-0), 2020-06-24
Supplement: 41522_2020_135_MOESM1_ESM.pdf [file 41522_2020_135_MOESM1_ESM.pdf]

## Supplementary Material

### ***Streptococcus mutans* adhesion force sensing in multi-species oral biofilms**

Can Wang,<sup>a</sup> Henny C. van der Mei,<sup>b</sup> Henk J. Busscher,<sup>b</sup> Yijin Ren<sup>a</sup>

<sup>a</sup>University of Groningen and University Medical Center Groningen, W.J. Kolff Institute,  
Department of Orthodontics, Groningen, The Netherlands.

<sup>b</sup>University of Groningen and University Medical Center Groningen, W.J. Kolff Institute,  
Department of Biomedical Engineering, Groningen, The Netherlands.

#Address correspondence to H.C. van der Mei. Email: [h.c.van.der.mei@umcg.nl](mailto:h.c.van.der.mei@umcg.nl)

**Supplementary Table 1** Zeta potentials measured in a calcium-phosphate buffer (1 mM CaCl<sub>2</sub>, 2 mM potassium phosphate, 50 mM KCl, pH 6.8) of the three bacterial strains involved in this study, demonstrating similar zeta potentials of live and dead *S. oralis* J22 and *A. naeslundii* T14V-J1 (no significant difference at  $P > 0.05$ , Mann-Whitney test).  $\pm$  signs represent standard deviations (SD) over triplicate experiments.

| <b>Strains</b>               | <b>Live/dead</b> | <b>Zeta potential (mV)</b> |
|------------------------------|------------------|----------------------------|
| <i>S. mutans</i> UA159       | live             | -2.8 $\pm$ 0.3             |
| <i>S. oralis</i> J22         | live             | -8.4 $\pm$ 0.2             |
|                              | dead             | -8.7 $\pm$ 0.5             |
| <i>A. naeslundii</i> T14V-J1 | live             | -4.6 $\pm$ 0.3             |
|                              | dead             | -5.3 $\pm$ 0.5             |

**Supplementary Table 2** Primer sequences of the genes used in this study.

| Gene            | Primer sequence (5' to 3') |                           |
|-----------------|----------------------------|---------------------------|
|                 | forward                    | reverse                   |
| <i>16S rRNA</i> | ACCAGAAAGGGACGGCTAAC       | TAGCCTTTTACTCCAGACTTTCCTG |
| <i>brpA</i>     | GGAGGAGCTGCATCAGGATTC      | AACTCCAGCACATCCAGCAAG     |
| <i>gbpB</i>     | ATACGATTCAAGGACAAGTAAG     | TGACCCAAAGTAGCAGAC        |
| <i>comDE</i>    | ACAATTCCTTGAGTTCCATCCAAG   | TGGTCTGCTGCCTGTTGC        |

## Calculation of initial adhesion forces, characteristic bond maturation times and stationary adhesion forces

Adhesion forces have been described<sup>1</sup> to increase with contact time between the interacting according to an exponential function

$$F_t = F_0 + (F_{\text{stationary}} - F_0) \left( \exp \left( -\frac{t}{\tau} \right) \right) \quad (1)$$

in which  $F_t$  is the adhesion force after bond maturation time  $t$ ,  $F_0$  is the initial adhesion force at 0 s bond maturation time and  $F_{\text{stationary}}$  indicates the stationary adhesion force reached after complete bond maturation, while  $\tau$  is the characteristic time constant for bond maturation. Least-square fitting of  $F_0$ ,  $\tau$  and  $F_{\text{stationary}}$  to the adhesion forces measured as a function of time was applied for their calculation.

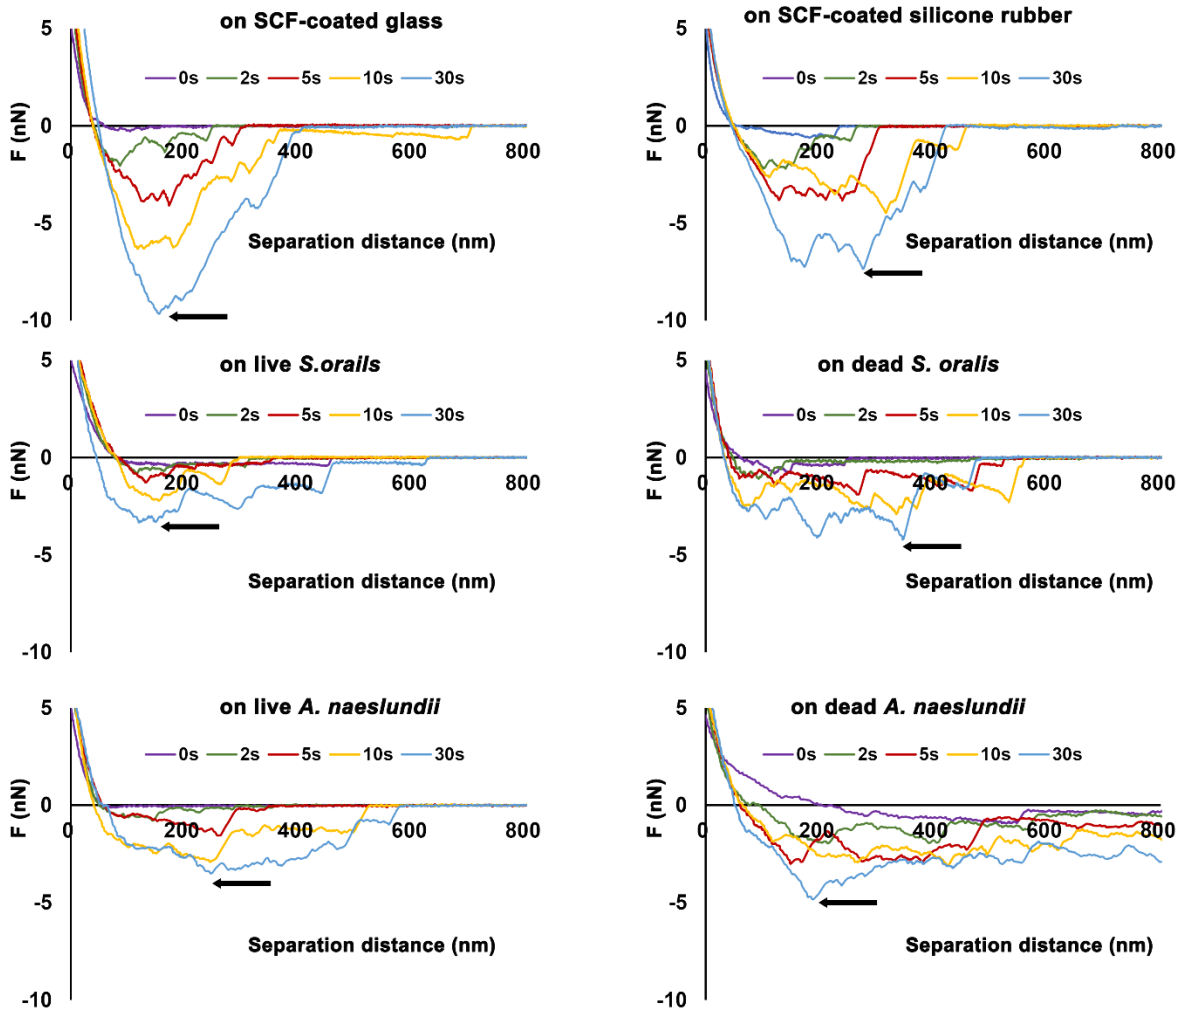

**Supplementary Fig. 1** Examples of retraction force-distance curves taken after different bond maturation times for a *S. mutans* UA159 probe on SCF-coated glass (left) and SCF-coated silicone rubber (right) surfaces, on live *S. oralis* J22 and *A. naeslundii* T14V-J1 cell surfaces (left) and on dead *S. oralis* J22 and *A. naeslundii* T14V-J1 cell surfaces (right). The arrow points to the most-negative force value, taken as the adhesion force for a given curve.

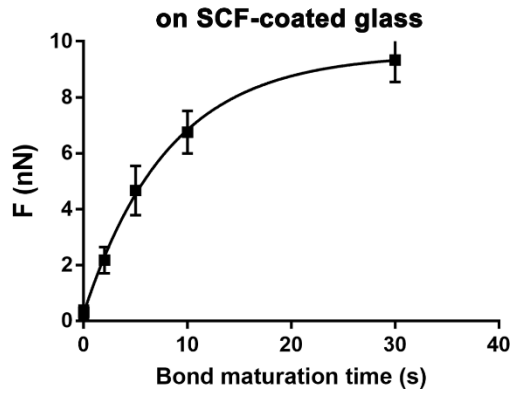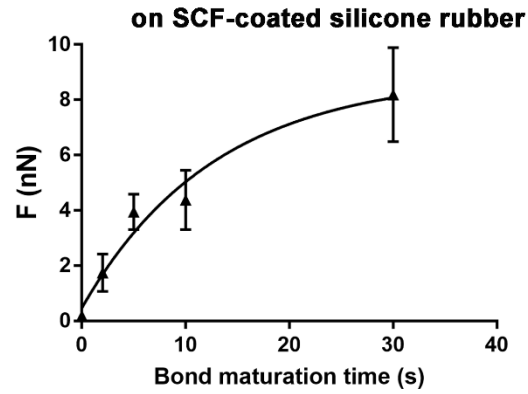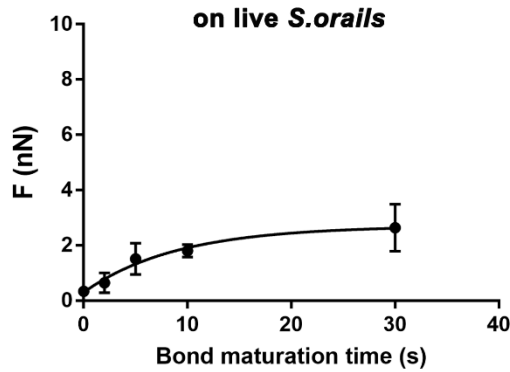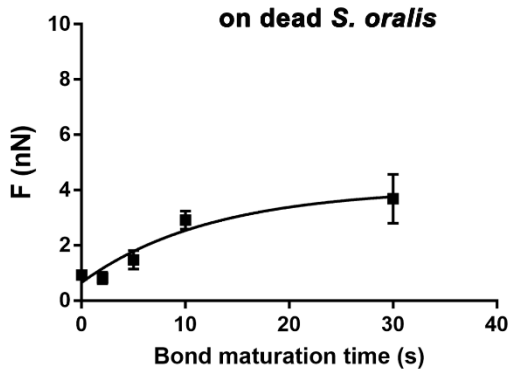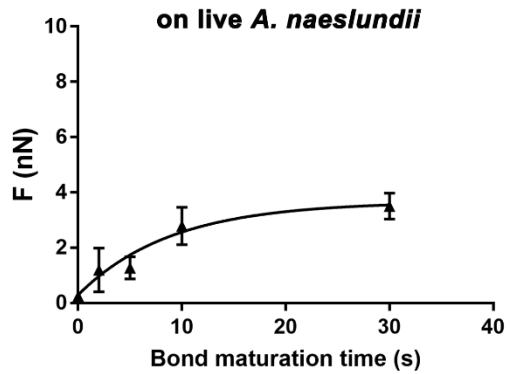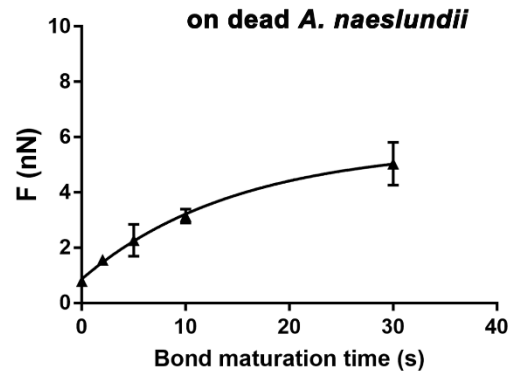

**Supplementary Fig. 2** *S. mutans* UA159 adhesion forces as a function of bond maturation time on SCF-coated glass (left) and SCF-coated silicone rubber (right) surfaces, on live *S. oralis* J22 and *A. naeslundii* T14V-J1 cell surfaces (left) and on dead *S. oralis* J22 and *A. naeslundii* T14V-J1 cell surfaces (right). Error bars represent standard deviations (SD) over example measurements, each taken on five contact points with one *S. mutans* probe.

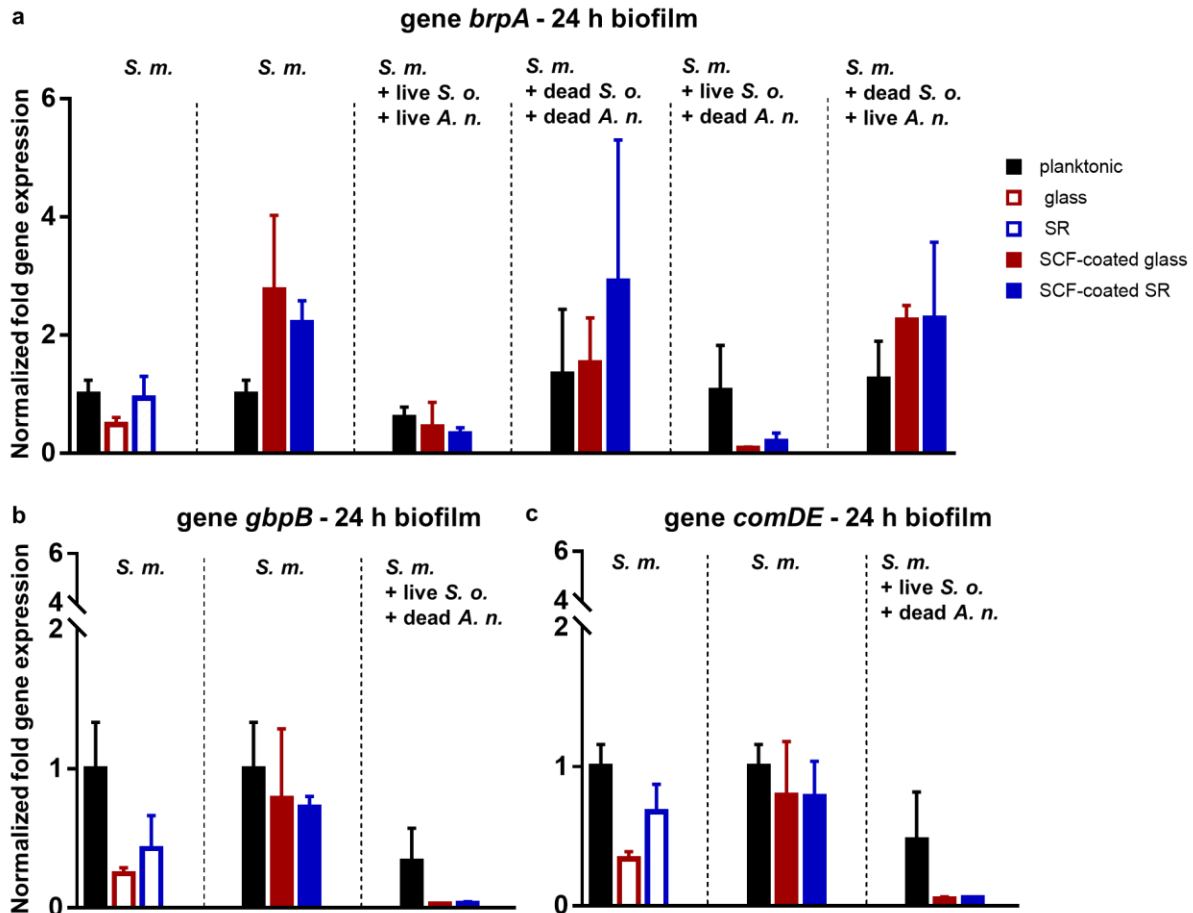

**Supplementary Fig. 3 Gene expression in 24 h *S. mutans* UA159 (*S. m.*) mono-species biofilms and different triple-species oral biofilms.** Biofilms comprised of *S. mutans* UA159 (*S. m.*) in combination with live or dead *S. oralis* J22 (*S. o.*) and *A. naeslundii* T14V-J1 (*A. n.*) on different substratum surfaces in the absence and presence of a salivary conditioning film.

**a** *brpA* gene expression

**b** *gbpB* gene expression

**c** *comDE* gene expression.

Error bars represent SD values over triplicate experiments with separately grown biofilms. Data on *brpA*, *gbpB* and *comDE* expressions in *S. mutans* UA159 mono-species biofilms on glass and silicone rubber surfaces in absence of a salivary conditioning film were taken from Wang et al.<sup>2</sup>

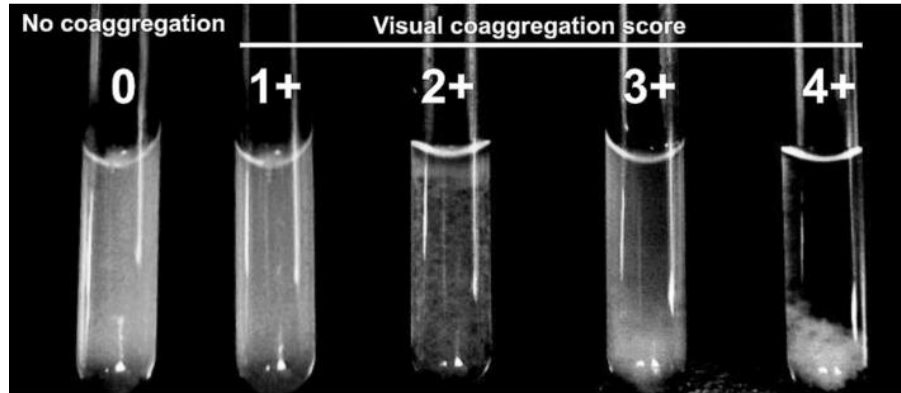

**Supplementary Fig. 4** Visual aggregation assay showing different coaggregation scores. Score 0: no change in turbidity and no visible co-aggregates; Score 1: weak coaggregation with dispersed aggregates in a turbid background; Score 2: clearly visible, small co-aggregates, not settling immediately; Score 3: large settling co-aggregates, leaving a slightly turbid suspension; Score 4: maximum coaggregation large co-aggregates settled immediately leaving a fully clear supernatant. (Taken from K. R. Min, M. N. Zimmer & A. H. Rickard (2010) *Physicochemical parameters influencing coaggregation between the freshwater bacteria *Sphingomonas natatoria* 2.1 and *Micrococcus luteus* 2.13*, *Biofouling*, 26:8, 931-940, DOI: 10.1080/08927014.2010.531128 and reprinted with permission from Taylor & Francis Ltd., <https://pubmed.ncbi.nlm.nih.gov/21058055>).



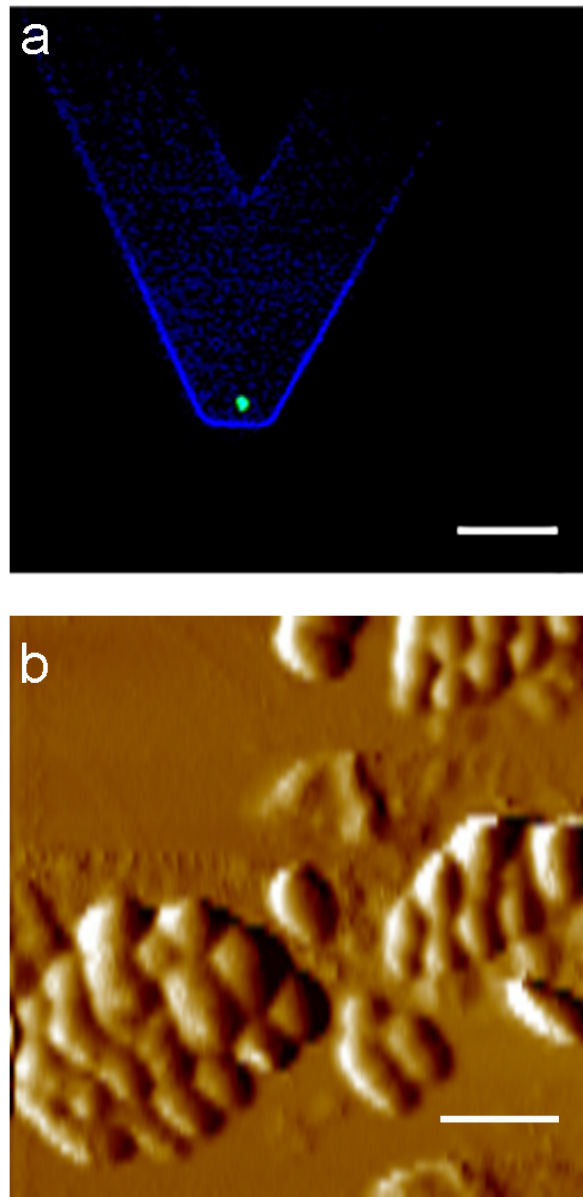

**Supplementary Fig. 5 Demonstration of single bacterial probe use.**

**a.** Fluorescence image of a single LIVE/DEAD stained *S. mutans* UA159 bacterium adhering on a tipless AFM cantilever. Green fluorescence demonstrates bacterial viability. Scale bar represents 20  $\mu\text{m}$ .

**b.** Verification of the absence of double-contour lines upon imaging *S. oralis* adhering to a glass surface, using a *S. mutans* probe. Scale bar represents 2  $\mu\text{m}$ .

## References

1. Busscher, H. J., Norde, W., Sharma, P. K. & Van der Mei, H. C. Interfacial re-arrangement in initial microbial adhesion to surfaces. *Curr. Opin. Colloid. Interf. Sci.* **15**, 510-517 (2010).
2. Wang, C., Hou, J., Van der Mei, H. C., Busscher, H. J. & Ren, Y. Emergent properties in *Streptococcus mutans* biofilms are controlled through adhesion force sensing by initial colonizers. *mBio* **10**, e01908-19 (2019).
